# Supplementary material for: Persons with type 1 diabetes have low blood oxygen levels in the supine and standing body positions
Source: PubMed Central journal article supplement — BMJ Open Diabetes Res Care. 2021 May 31;9(1):e001944. doi: 10.1136/bmjdrc-2020-001944 (PMC8169468; doi:10.1136/bmjdrc-2020-001944), 2021-05-31
Supplement: bmjdrc-2020-001944supp002.pdf [file bmjdrc-2020-001944supp002.pdf]

**Table S1** – Participant characteristics by origin study and diabetes status

| Participant type                                 | FinnDiane      |                 | Rubinaut        |
|--------------------------------------------------|----------------|-----------------|-----------------|
|                                                  | Control        | T1D             | T1D             |
| N                                                | 55             | 80              | 49              |
| Age (years)                                      | 43 ± 13        | 39 ± 5          | 59 ± 10         |
| Women                                            | 23 (42)        | 32 (40)         | 21 (43)         |
| Diabetes duration (years)                        | -              | 21 ± 2          | 36 ± 14         |
| Normoalbuminuria                                 | -              | 74 (93)         | 26 (53)         |
| Microalbuminuria                                 | -              | 5 (6)           | 0 (0)           |
| Macroalbuminuria                                 | -              | 1 (1)           | 23 (47)         |
| Urine albumin creatinine ratio (mg/g creatinine) | -              | 4.5 [4, 5.1]    | 85 [71, 96]     |
| Non-smokers                                      | 35 (64)        | 75 (94)         | 39 (80)         |
| Body mass index (kg/m <sup>2</sup> )             | 25.1 ± 3.6     | 26.8 ± 4.7      | 26.2 ± 4.1      |
| Heart rate (beats minute <sup>-1</sup> )         | 59 ± 8         | 64 ± 12         | 67 ± 10         |
| Systolic blood pressure (mmHg)                   | 125 ± 14       | 131 ± 17        | 135 ± 18        |
| Diastolic blood pressure (mmHg)                  | 62 ± 9         | 79 ± 8          | 76 ± 11         |
| HbA <sub>1c</sub> (% (mmol/mol))                 | 5 ± 0 (33 ± 2) | 8 ± 3 (65 ± 13) | 8 ± 3 (62 ± 10) |
| Hemoglobin (mmol/L)                              | 8.9 ± 0.8      | 8.6 ± 0.7       | 8.5 ± 0.9       |
| Creatinine (μmol/L)                              | 78 ± 14        | 65 ± 10         | 95 ± 44         |
| Cholesterol (mmol/L)                             | 4.8 ± 0.9      | 4.6 ± 0.8       | 4.5 ± 0.9       |
| Baroreflex sensitivity (ms/mmHg)                 | 13 [8, 18]     | 11 [7, 21]      | 5 [4, 11]       |

**Table S1.** Data are presented as n (%), mean ± SD and median [quartile 1, quartile 3]. Normoalbuminuria was defined as urine albumin <30 mg/24-hour or <30 mg/g creatinine in two out of three consecutive measurements, microalbuminuria was defined as urine albumin between 30 and 300 mg/24-hour or between 30 and 300 mg/g creatinine in two out of three consecutive measurements and macroalbuminuria was defined as urine albumin >300 mg/24-hour or >300 mg/g creatinine in two out of three consecutive measurements. HbA<sub>1c</sub> = Hemoglobin A1c.

**Table S2** – Orthostatic Blood Pressure Measurements

|                       |           | Controls | T1D      |
|-----------------------|-----------|----------|----------|
| Blood pressure (mmHg) |           | 54       | 128      |
| Supine                | Systolic  | 127 ± 18 | 130 ± 19 |
|                       | Diastolic | 78 ± 10  | 71 ± 15  |
| Standing              | Systolic  | 128 ± 14 | 144 ± 30 |
|                       | Diastolic | 84 ± 8   | 86 ± 13  |

**Table S2.** Data are presented as mean ± SD. Data was unavailable for one healthy control and one participant with type 1 diabetes.
